# Supplementary material
Source: Springer Nature journal article supplement (https://www.springermedizin.de/resource/supplementary/13256_2013_2812_MOESM1_ESM.pdf/9650590)

**a**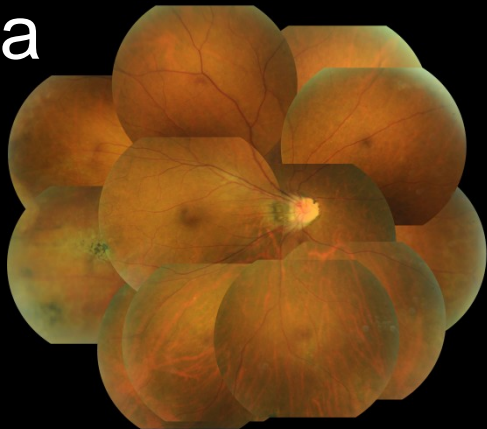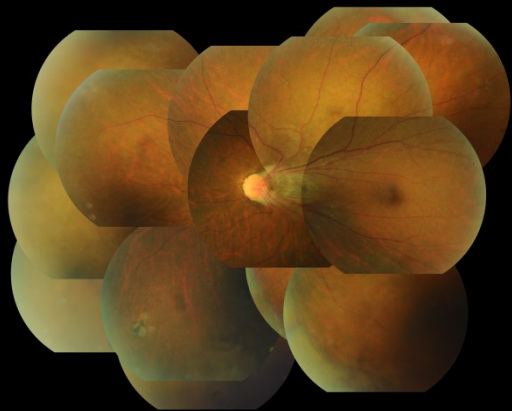**b**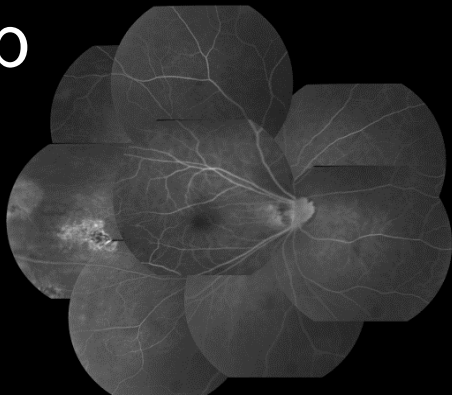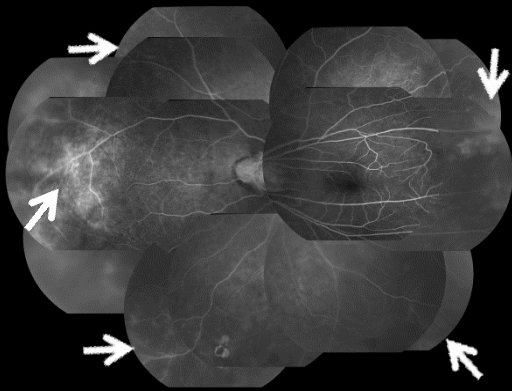

Supplement: MOESM1 [file 9650590]
